# Supplementary material for: Triatoma guazu Lent and Wygodzinsky Is a Junior Synonym of Triatoma williami Galvão, Souza and Lima
Source: MDPI journal article supplement (doi:10.3390/insects13070591), 2022-06-28
Supplement: s1 [file s1]

## Supplementary material

### Data S1. Examined material of the studied species

The boldface text represent specimens used for geometric morphometric analysis, red text represent specimen used for analyzed male genitalia and blue text for analyzed female genitalia. A slash (/), separates the lines, a double slash (//) different labels and a semicolon (;) separates the specimens. The material is listed as per the original specimen label.

#### *Triatoma guazu*

**Type material.** *Triatoma guazu* / det. H. Lent/ Data: VI-95/ Nº. FIOCRUZ 2861// BRASIL- ESTADO MT/ Local Barra do Garças/ Col. S.Vieira/ Data XI-94/ Nº2861// Alótipo // CTIOC / Nº 9451 ♂.

**Non-type material.** T. guazu // 2617 // CTIOC / Nº. 6750 ♀; FIOCRUZ / Instituto Oswaldo Cruz / Barra do Garças – MT / 23/11/98 ♂ // *Triatoma* / guazu / Lent & Wygod. / R. Carcavallo det.1998 // 5514 // CTIOC / Nº.6746; FIOCRUZ / Instituto Oswaldo Cruz / Barra do Garças / MT / 23/11/98 ♀ // *Triatoma* / guazu / Lent & Wygod. / R. Carcavallo det.1998 // 5512 // CTIOC / Nº. 6745; FIOCRUZ / Instituto Oswaldo Cruz / Barra do Garças / 23/11/98 ♂ // *Triatoma* / guazu / Lent & Wygod / R. Carcavallo det.1998 //5315 //CTIOC / Nº.6747; FIOCRUZ / Instituto Oswaldo Cruz / T. guazu/ Barra das Garças/ Mato Grosso/ Criado em lab/ 08/97 //5520// CTIOC / Nº.6787 ♂; FIOCRUZ / Instituto Oswaldo Cruz / T. guazu/ Barra dos Garças/ Mato Grosso/ Criado em lab/ 08/97 // 5519 // CTIOC / Nº.6751 ♂; FIOCRUZ / Instituto Oswaldo Cruz / T. guazu/ Barra das Garças/ Mato Grosso/ Criado em lab/ 08/97 // 5518// CTIOC / Nº.6748 ♀; Brasil – Mato / Grosso – Barra /do Garça/ Laborat. // *Triatoma* / guazu/ Lent & Wyg- /R. Carcavallo det.1997 //5524 // CTIOC / Nº.6755 ♀; Brasil – Mato / Grosso – Barra /do Garça/ Laborat // *Triatoma* guazu / Lent & Wygodz- /1979/ R. Carcavallo det.1997 //5521// CTIOC/ Nº.6752 ♂; Brasil – Mato / Grosso – Barra /do Garça/ Laborat. // Lent & Wygodz- /1979/ R. Carcavallo det.1997 //5523// CTIOC /Nº. 6754 ♀; Brasil – Mato / Grosso – Barra /do Garça/ Laborat. // Lent & Wygodz- /1979/ R. Carcavallo det.1997 //5522// CTIOC /Nº. 6753 ♂; **FIOCRUZ / Instituto Oswaldo Cruz / Barra do Garças / MT / 13/05/21 ♀ // *Triatoma* / guazu / Lent & Wygod. / JP. Correia det.2021 // CTIOC / Nº. 14000; FIOCRUZ / Instituto Oswaldo Cruz / Barra do Garças / MT / 13/05/21 ♀ // *Triatoma* / guazu / Lent & Wygod. / JP. Correia det.2021 // CTIOC / Nº. 14001; FIOCRUZ / Instituto Oswaldo Cruz / Barra do Garças / MT / 13/05/21 ♀ // *Triatoma* / guazu / Lent & Wygod. / JP. Correia det.2021 // CTIOC / Nº. 14002.**

#### *Triatoma matogrossensis*

**Non-type material.** Coleção/ Rodolfo Carcavallo// 3884 //CTIOC/ Nº. 4605 ♀; BRASIL/ Mato Grosso/ LAB/ IV-83// Coleção/ Rodolfo Carcavallo// 3880// CTIOC/ Nº. 4606 ♀; BRASIL/ Mato Grosso/Lab./ V.83// Coleção/ Rodolfo Carcavallo//3881//CTIOC/ Nº 4607 ♂; *Triatoma*/ matogrossensis/ Leite y Barbosa/ R. Carcavallo det. 1987// BRASIL/ Mato Grosso/ LAB/ IV-83// Coleção/ Rodolfo Carcavallo// CTIOC/ Nº. 4608 ♀; *Triatoma* mato-/grossensis/ Leite y

Barbosa/ R. Carcavallo det. 1984// BRASIL/ Mato Grosso/ laboratório/ IV-84// 3883// Coleção/ Rodolfo Carcavallo// CTIOC/ Nº. 4609 ♀; BRASIL/ Mato Grosso/ laboratório/ IV-84// 3893// Coleção/ Rodolfo Carcavallo// CTIOC/ Nº. 4610 ♂; BRASIL/ Mato Grosso/ laboratório/ IV-84// 3890// Coleção/ Rodolfo Carcavallo// CTIOC/ Nº. 4611 ♀; Br. Mato Grosso/ Lab IILP/ IV.84//3897// Coleção/ Rodolfo Carcavallo/ /CTIOC/ Nº. 4613 ♂; Coleção/ Rodolfo Carcavallo// 3892// CTIOC/ Nº. 4614 ♀; Coleção/ Rodolfo Carcavallo// 3888// CTIOC/ Nº. 4616 ♂; Coleção/ Rodolfo Carcavallo// 3854// CTIOC/ Nº. 4621 ♂; Coleção/ Rodolfo Carcavallo// 3896// CTIOC/ Nº. 4622 ♂; BRASIL/ Mato Grosso/ LAB/ IV-84// Coleção/ Rodolfo Carcavallo// 3902// CTIOC/ Nº. 4626 ♀; BRASIL/ Mato Grosso/ LAB/ V-83// Coleção/ Rodolfo Carcavallo// 3903// CTIOC/ Nº. 4627 ♀; Coleção/ Rodolfo Carcavallo// 3905// CTIOC/ Nº. 4629 ♀; Coleção/ Rodolfo Carcavallo// 3906// CTIOC/ Nº. 4630 ♀; BRASIL/ Mato Grosso/ LAB/ IV-84// Coleção/ Rodolfo Carcavallo// 3908// CTIOC/ Nº. 4643 ♀; Coleção/ Rodolfo Carcavallo// 3909// CTIOC/ Nº. 4634 ♂; *Triatoma mato-*/ *grossensis*/ H. LENT det./ Miranda M. Grosso/ 7-79 domic./ J. V. Alves// CTIOC/ Nº. 4636 ♀; *Triatoma mato-*/ *grossensis*/ H. LENT det./ Miranda M. Grosso/ 7-79 domic./ J. V. Alves// CTIOC/ Nº. 4637 ♀.

*Triatoma oliveirai*

**Type material.** Porto Alegre// Holotypus//HOLO /TYPUS //34.// *Eutriatoma oliveirai*/ Neiva, Pinto+Lent, 1939/ Holotipo ♀/ H. LENT DET. // Nº1042 / HEMIPTERA/ Inst. Oswaldo Cruz// CTIOC/ Nº. 8973// *Eutriatoma oliveirai*/ Holótipo/ Nº1048.

**Non-type material.** exemp 1 // Nº1049 / HEMIPTERA/ Inst. Oswaldo Cruz // T. oliveirai // CTIOC/ Nº. 12087 ♀; *Triatoma* / *oliveirai* / H. LENT det. // SAPUCAIA DO SUL- RS / MORRO SAPUCAIA/ 19-X-86/ BARCELLOS, A. // 1999 // T. *oliveirai* ♀

*Triatoma williami*

**Type material.** T. williami/ Galvão e col./ 1965 ♀/ M. Piranhas/ E. Goiás// 2353// BUTANTAN// 14// Paratypus; T. williami/ Galvão e col./ 1965 ♂/ M. Piranhas/ E. Goiás// 186// BUTANTAN// Paratypus// parátipo// Nº 1762/ HEMIPTERA/ Inst. Oswaldo Cruz; T. williami/ Galvão e col./ 1965 ♂?/ Piranhas, Goiás/ A. Galvão del. 1969// 870// 37/ Alótipo ♂.

**Non-type material.** T. *williami*??/ Det. J. Jurberg/ Data 7. 2006/ Nº FIOCRUZ// Barra do Garça, MT/ Serra do Roncador/ Col. Vanda Cunha/ 9. 2004 // CTIOC/ Nº 11063 ♀; T. *williami*/ Det. J. Jurberg/ Data 7. 2006/ Nº FIOCRUZ// Barra do Garça, MT/ Serra do Roncador/ Col. Vanda Cunha/ 9. 2004 // CTIOC/ Nº 11065 ♀; T. *williami*??/ Det. J. Jurberg/ Data 7. 2006/ Nº FIOCRUZ// Barra do Garça, MT/ Serra do Roncador/ Col. Vanda Cunha/ 9. 2004 // CTIOC/ Nº 11067 ♂; T. *williami*??/ Det. J. Jurberg/ Data 7. 2006/ Nº FIOCRUZ// Barra do Garça, MT/ Serra do Roncador/ Col. Vanda Cunha/ 9. 2004 – criad. lab // CTIOC/ Nº 11068 ♀; T. williami Galvão,/ Souza & Lima, 1965/ Det. Bulhões, D. M/ Data 25.03.99/ Nº FIOCRUZ// BRASIL – ESTADO MT/ Local P. N. de Serra/ Azul B. do Garças/ Col. Bulhões, D. M/ Data 25.03.99/

Nº 2926// CTIOC/ Nº 11066 ♀; T. williami Galvão/ Souza & Lima, 1965/ Det. Bulhões, D. M/ Data 25.03.99/ Nº FIOCRUZ// BRASIL – ESTADO MT/ Local P. N. de Serra/ Azul B. do Garças/ Col. Bulhões, D. M/ Data 25.03.99/ Nº 1925// CTIOC/ Nº 11069 ♂; T. williami/ crist. Nº 4// CTIOC/ Nº 11083 ♂; T. williami Galvão/ Souza & Lima, 1965/ criado em lab./ abril 99// BRASIL – ESTADO GO/ Local Fazenda Nova/ Col. Janizete Garcia/ Data 07.95/ I. O. Cruz 5532// T. williami Galvão/ Souza & Lima, 1965/ Det./ Data 14.04.99/ Nº FIOCRUZ 5532// CTIOC/ Nº 11021 ♀; T. williami/ Det. José Jurberg/ Data III. 2010/ Nº FIOCRUZ 3364// FIOCRUZ Instituto Oswaldo Cruz/ MT. Serra do Roncador – Barra/ do Garça- XV.2007/ Col Vanda Cunha/ Criado no insetario// CTIOC/ Nº 5592 ♀; T. williami/ Det. José Jurberg/ Data III. 2010/ Nº FIOCRUZ 3365/ FIOCRUZ Instituto Oswaldo Cruz/ MT. Serra do Roncador – Barra/ do Garça- XV.2007/ Col Vanda Cunha/ Criado no insetario// CTIOC/ Nº 5593 ♂; T. williami/ Det. José Jurberg/ Data III. 2010/ Nº FIOCRUZ 3363// FIOCRUZ Instituto Oswaldo Cruz/ MT. Serra do Roncador – Barra/ do Garça- XV.2007/ Col Vanda Cunha/ Criado no insetario// Cop. Herman Lent nº 3363// CTIOC/ Nº 5591 ♀; T. williami Galvão/ Souza & Lima, 1965/ Det. Bulhões, D. M/ Data 25.03.99/ Nº FIOCRUZ// BRASIL – ESTADO MT/ Local P. N. de Serra/ Azul B. do Garças/ Col. Bulhões, D. M/ Data 25.03.99/ Nº 5604// CTIOC/ Nº 10225 ♀; T. williami Galvão/ Souza & Lima, 1965/ Det. Bulhões, D. M/ Data 25.03.99/ Nº FIOCRUZ// BRASIL – ESTADO MT/ Local P. N. de Serra/ Azul B. do Garças/ Col. Bulhões, D. M/ Data 25.03.99/ Nº 5600// T. williami ♀; T. williami Galvão/ Souza & Lima, 1965/ Det. Bulhões, D. M/ Data 25.03.99/ Nº FIOCRUZ// BRASIL – ESTADO MT/ Local P. N. de Serra/ Azul B. do Garças/ Col. Bulhões, D. M/ Data 25.03.99/ Nº 5605// CTIOC/ Nº 110227 ♂; Triatoma williami ♀/ 174// ♀// CTIOC/ Nº 11084; FIOCRUZ Instituto Oswaldo Cruz// T. williami/ criado em lab. 10.99// CTIOC/ Nº 11079 ♀; T. williami/ Galvão e col./ 1965 ♀/ Aquidana/ MG-Brasil/ capt. Sebastião/ A. Jonza-Dom./ B. Galvão det./ CTIOC/ Nº 11085; BRASIL – ESTADO GO/ Local Faz. Nova/ col Donizete G. Silva/ Data VII/95/ Nº// 5448// CTIOC/ Nº 110211♀; BRASIL – Goiás/ Local M. de Sta/ Rita/ Data Set. 99/ I. O. Cruz./ CTIOC/ Nº 11080 ♀; T. williami Galvão/ Souza & Lima, 1965/ Det. Bulhões, D. M/ Data 25.03.99/ Nº FIOCRUZ// BRASIL – ESTADO MT/ Local P. N. de Serra/ Azul B. do Garças/ Col. Bulhões, D. M/ Data 25.03.99/ Nº 2994// CTIOC/ Nº 11062 ♂; T. williami Galvão/ Souza & Lima, 1965/ Det. Bulhões, D. M/ Data 25.03.99/ Nº FIOCRUZ// BRASIL – ESTADO MT/ Local P. N. de Serra/ Azul B. do Garças/ Col. Bulhões, D. M/ Data 25.03.99/ Nº 5603// CTIOC/ Nº 11085 ♂; T. williami Galvão/ Souza & Lima, 1965/ Det. Bulhões, D. M/ Data 25.03.99/ Nº FIOCRUZ// BRASIL – ESTADO MT/ Local P. N. de Serra/ Azul B. do Garças/ Col. Bulhões, D. M/ Data 25.03.99/ Nº 5603// CTIOC/ Nº 10224 ♂; T. williami??/ Det. J. Jurberg/ Data 2006// Barra do Garça, MT/ Serra do Roncador/ Col. Vanda Cunha/ 9. 2004 // CTIOC/ Nº 11070 ♂; T. williami??/ Det. J. Jurberg/ Data 2006// Barra do Garça, MT/ Serra do Roncador/ Col. Vanda Cunha/ 9. 2004 // CTIOC/ Nº 11072 ♀; Triatoma williami// Barra do Garças-MT/ Col. Mirian F. Martins/ 02.X.19/ Det. Cleber Galção// Reared in LNIRTT/ Rio de Janeiro-RJ/ Inst. Oswaldo Cruz// CTIOC/ Nº 13007 ♀; Triatoma williami// Barra do Garças-MT/ Col. Mirian F. Martins/ 02.X.19/ Det. Cleber Galção// Reared in LNIRTT/ Rio de Janeiro-RJ/ Inst. Oswaldo Cruz// CTIOC/ Nº 13009 ♀; Triatoma williami// Barra do Garças-MT/ Col. Mirian F. Martins/ 02.X.19/ Det. Cleber Galção// Reared in LNIRTT/ Rio de Janeiro-RJ/ Inst. Oswaldo Cruz// CTIOC/ Nº 13008 ♂; Triatoma williami// Barra do Garças-MT/ Col. Mirian F. Martins/ 02.X.19/ Det. Cleber Galção// Reared in LNIRTT/ Rio de Janeiro-RJ/ Inst. Oswaldo Cruz// CTIOC/ Nº 13006 ♀; Triatoma williami// Barra do Garças-MT/ Col. Mirian

F. Martins/ 02.X.19/ Det. Cleber Galção// Reared in LNIRTT/ Rio de Janeiro-RJ/ Inst. Oswaldo Cruz// CTIOC/ Nº 13005 ♀.

**Table S1.** Diagnostic character sets between *T. guazu* and *T. oliveirai*.

| Diagnostic character                                  | <i>T. guazu</i>                                                 | <i>T. oliveirai</i>                                                    |
|-------------------------------------------------------|-----------------------------------------------------------------|------------------------------------------------------------------------|
| Length of the anteocular region                       | Four times longer than the postocular                           | Three times longer than the postocular                                 |
| Eye position in relation to the head, in lateral view | Slightly exceeding the level of the ventral and dorsal surface  | Not exceeding the level of the ventral surface and far from the dorsal |
| Length of the submedian carina of the pronotum        | Ending near or reaching the distal margin of the posterior lobe | Limited to the submedian region of the posterior lobe                  |
| Spongy fossa                                          | Absent in females                                               | Absent in males (unanalyzed female)                                    |

**Data S2.** *T. guazu* and *T. williami* character set

**Character list:** Characters analyzed for *T. guazu* and *T. williami*. Character 9 (red status) indicates the only difference between species.

#### Coating

- 1- Body surface, bristles: Short and sparse or not very apparent
- 2- Labia, segments III and IV (second and third segments visible, respectively), bristles, in lateral view: Short

#### Coloration

- 3- Head, spots, in dorsal view: Absent
- 4- Neck, spots, in dorsal view: Present
- 5- Neck, 1+1 spots, in dorsal view: White dotted
- 6- Pronotum, collar, spots, in dorsal view: Absent
- 7- 9- Pronotum, posterior lobe, predominant color, in dorsal view: Dark
- 8- Connexivum, dorsal plates, spots: Present
- 9- Connexivum, dorsal plates, pattern of spots: **for *T. guazu*, dark and wide over the intersegmental sutures; *T. williami*, dark and narrow over the intersegmental sutures**
- 10- Abdomen, color pattern, in ventral view: Simple
- 11- Femurs, spots: Absent
- 12- Tibias, spots: Absent
- 13- Tibias, spots: Absent

#### Integument texture

- 14- Head, synthlipsis, in dorsal view: Strongly rough

- 15- Head, region between tubercle and eye, in side view: Rough
- 16- Pronotum, posterior lobe, in dorsal view: Rough
- 17- Thorax, propleura and metapleura, in lateral view: Rough
- 18- Abdomen, sternites: Striated

## Head

- 19- Head, shape, in dorsal view: Subcylindrical
- 20- Head, length in relation to width at eye level, in dorsal view: Twice or longer than wide
- 21- Head, length in relation to the length of the pronotum, in dorsal view: As long as or longer
- 22- Anteocular region, length in relation to the post-ocular, in dorsal view: More than four to five times longer
- 23- Postocular region, shape of the margins, in dorsal view: Subrectilinear or weakly convex
- 24- Maxillary plate, length in relation to the apical margin of the postclypeus, in dorsal view: Greater
- 25- Mandibular plate, tooth-like, in dorsal view: Discreet
- 26- Mandibular plate, length in relation to the maxillary plate, dorsal view: At least 1/3 to 1/2
- 27- Labia, third segment visible, length compared to second: Shorter
- 28- Labia, first visible segment, apex in relation to the antenniferous tubercle, in lateral view: Not reaching the level of the anterior margin
- 29- Labia, second visible segment, apex in relation to the eye, in lateral view: Exceeding or reaching the level of the posterior margin
- 30- Lip, third segment visible, shape of the apex, in ventral view: Tapered
- 31- Eye, in relation to the ventral surface of the head, in lateral view: Reaching or surpassing it
- 32- Eye, length in relation to the total length of the head, dorsal view: Less than or equal to 1/4
- 33- Eye, width in relation to the synthlipsis, in dorsal view: Smaller
- 34- Postocular region, approximation between the eyes, dorsal view: Proximal
- 35- Antenniferous tubercles, location, in dorsal view: Median, between the apex of the head and the eyes
- 36- First antennal segment, position of the apex in relation to the level of the clypeus, in dorsal view: Not reaching it
- 37- Third antennal segment, length compared to second: Shorter

## Pronotum

- 38- Pronotum, submedian carina, length: Ending near or reaching distal margin of posterior lobe
- 39- Pronotum, lateral carina, in dorsal view: Absent
- 40- Pronotum, anterolateral angles, length and width proportion: Wider than long;
- 41- Pronotum, anterolateral angles, direction in relation to the longitudinal cephalic axis, in dorsal view: Divergent
- 43- Pronotum, anterior lobe, basal disc tubercles, in dorsal view: Absent or obsolete
- 44- Pronotum, anterior lobe, lateral tubercles, in dorsal view: Absent or obsolete

- 45- Pronotum, posterior lobe, towards the humeral angles, in lateral view: Not elevated;
- 46- Scutellum, central depression, in dorsal view: Well developed
- 47- Scutellum, posterior process, length in relation to the main body of the scutellum, in dorsal view: Shorter
- 48- Scutellum, posterior process, shape, in dorsal view: Conical
- 49- Scutellum, posterior process, form, in lateral view: Straight, slightly elevated;
- 50- Scutellum, posterior process, shape of the apex, in lateral view: Rounded
- 51- Prosternum, prosternal groove, shape: Short and wide
- 52- Prosternum, prosternal sulcus, lateral margins: Straight, parallel, narrowing in the apical third
- 53- Wing, hemelytra, length, in dorsal view: Reaching or slightly surpassing the apex of the seventh urotergite
- 54- Wing, small branch connecting basal portion R+M to S: Present

## Abdomen

- 55- Abdomen, width in relation to total body length: Less than half
- 57- Abdomen, suture of the urosternite plate in relation to the dorsal connective plate, ventral view: Distal
- 58- Connective, ventral plates: Visible
- 59- Connective, ventral plates: Perceptible, similar in width to that displayed dorsally

## Legs

- 60- Anterior and median femur, denticles: Present
- 62- Tibia, fossulae spongy: Present only in males

**Table S2. A–D.** Estimative of pairwise divergences between sequences of the studied species for 16S, COI, COII and CytB.

### A. 16S

[illegible]

|                                       |                                                                                         |
|---------------------------------------|-----------------------------------------------------------------------------------------|
| 12. <i>Triatoma brasiliensis</i> _174 | 0,0560,0560,0560,0810,0810,0840,0620,0620,0620,0030,006                                 |
| 13. <i>Triatoma juazeirens</i> _2017  | 0,0650,0620,0620,0810,0810,0900,0620,0620,0620,0230,0260,020                            |
| 14. <i>Triatoma juazeirens</i> _209   | 0,0620,0590,0590,0770,0770,0870,0590,0590,0590,0200,0230,0170,003                       |
| 15. <i>Triatoma melanica</i> _CTA206  | 0,0590,0560,0560,0870,0870,0900,0560,0560,0560,0260,0290,0290,0320,035                  |
| 16. <i>Triatoma melanica</i>          | 0,0560,0530,0530,0840,0840,0870,0530,0530,0530,0230,0260,0260,0350,0320,003             |
| 17. <i>Triatoma sherlocki</i>         | 0,0600,0560,0560,0860,0860,0890,0530,0530,0530,0210,0240,0240,0300,0300,0180,018        |
| 18. <i>Triatoma sherlocki</i> 80      | 0,0560,0530,0530,0810,0810,0840,0500,0500,0500,0200,0230,0230,0320,0290,0200,0170,000 - |

|                               | 1     | 2     | 3     | 4     | 5     | 6     | 7     | 8     | 9     | 10    | 11    | 12    | 13    | 14    | 15    | 16    | 17 |
|-------------------------------|-------|-------|-------|-------|-------|-------|-------|-------|-------|-------|-------|-------|-------|-------|-------|-------|----|
| 1.Triatoma guazu              |       |       |       |       |       |       |       |       |       |       |       |       |       |       |       |       |    |
| 2.Triatoma williami_4         | 0,015 |       |       |       |       |       |       |       |       |       |       |       |       |       |       |       |    |
| 3.Triatoma williami_5         | 0,000 | 0,015 |       |       |       |       |       |       |       |       |       |       |       |       |       |       |    |
| 4.Triatoma matogrossensis_192 | 0,108 | 0,114 | 0,108 |       |       |       |       |       |       |       |       |       |       |       |       |       |    |
| 5.Triatoma_matogrossensis     | 0,139 | 0,145 | 0,139 | 0,031 |       |       |       |       |       |       |       |       |       |       |       |       |    |
| 6.Triatoma matogrossensis_31  | 0,139 | 0,145 | 0,139 | 0,031 | 0,000 |       |       |       |       |       |       |       |       |       |       |       |    |
| 7.Triatoma matogrossensis_191 | 0,108 | 0,114 | 0,108 | 0,000 | 0,031 | 0,031 |       |       |       |       |       |       |       |       |       |       |    |
| 8.Triatoma jatai_16           | 0,091 | 0,085 | 0,091 | 0,138 | 0,157 | 0,157 | 0,138 |       |       |       |       |       |       |       |       |       |    |
| 9.Triatoma jatai_05           | 0,091 | 0,085 | 0,091 | 0,138 | 0,157 | 0,157 | 0,138 | 0,000 |       |       |       |       |       |       |       |       |    |
| 10.Triatoma jatai_03          | 0,091 | 0,085 | 0,091 | 0,138 | 0,157 | 0,157 | 0,138 | 0,000 | 0,000 |       |       |       |       |       |       |       |    |
| 11.Triatoma brasiliensis_40   | 0,125 | 0,144 | 0,125 | 0,161 | 0,194 | 0,194 | 0,161 | 0,188 | 0,188 | 0,188 |       |       |       |       |       |       |    |
| 12.Triatoma brasiliensis_172  | 0,131 | 0,150 | 0,131 | 0,168 | 0,201 | 0,201 | 0,168 | 0,194 | 0,194 | 0,194 | 0,005 |       |       |       |       |       |    |
| 13.Triatoma melanica_J        | 0,150 | 0,169 | 0,150 | 0,181 | 0,202 | 0,202 | 0,181 | 0,162 | 0,162 | 0,162 | 0,085 | 0,080 |       |       |       |       |    |
| 14.Triatoma melanica_I        | 0,150 | 0,169 | 0,150 | 0,181 | 0,202 | 0,202 | 0,181 | 0,162 | 0,162 | 0,162 | 0,085 | 0,080 | 0,000 |       |       |       |    |
| 15.Triatoma melanica_H        | 0,150 | 0,169 | 0,150 | 0,181 | 0,202 | 0,202 | 0,181 | 0,162 | 0,162 | 0,162 | 0,085 | 0,080 | 0,000 | 0,000 |       |       |    |
| 16.Triatoma melanica_G        | 0,150 | 0,169 | 0,150 | 0,181 | 0,202 | 0,202 | 0,181 | 0,162 | 0,162 | 0,162 | 0,085 | 0,080 | 0,000 | 0,000 | 0,000 |       |    |
| 17.Triatoma juazeirensis      | 0,127 | 0,127 | 0,127 | 0,125 | 0,141 | 0,141 | 0,125 | 0,168 | 0,168 | 0,168 | 0,050 | 0,050 | 0,087 | 0,087 | 0,087 | 0,042 | -  |

|                               | 1     | 2     | 3     | 4     | 5     | 6     | 7     | 8     | 9 |
|-------------------------------|-------|-------|-------|-------|-------|-------|-------|-------|---|
| 1.Triatoma guazu_29           |       |       |       |       |       |       |       |       |   |
| 2.Triatoma williamsi_36       | 0,018 |       |       |       |       |       |       |       |   |
| 3.Triatoma matogrossensis_192 | 0,167 | 0,162 |       |       |       |       |       |       |   |
| 4.Triatoma matogrossensis_33  | 0,162 | 0,167 | 0,033 |       |       |       |       |       |   |
| 5.Triatoma matogrossensis_31  | 0,166 | 0,171 | 0,033 | 0,000 |       |       |       |       |   |
| 6.Triatoma matogrossensis_191 | 0,167 | 0,162 | 0,000 | 0,033 | 0,033 |       |       |       |   |
| 7.Triatoma brasiliensis_174   | 0,157 | 0,143 | 0,169 | 0,183 | 0,188 | 0,169 |       |       |   |
| 8.Triatoma melanica           | 0,167 | 0,156 | 0,236 | 0,254 | 0,254 | 0,236 | 0,152 |       |   |
| 9.Triatoma sherlocki_80       | 0,165 | 0,156 | 0,197 | 0,213 | 0,218 | 0,197 | 0,117 | 0,092 | - |

[illegible]

|     |                                          |       |       |       |       |       |       |       |       |       |       |       |   |
|-----|------------------------------------------|-------|-------|-------|-------|-------|-------|-------|-------|-------|-------|-------|---|
| 3.  | <i>Triatoma matogrossensis</i> _32       | 0,153 | 0,140 |       |       |       |       |       |       |       |       |       |   |
| 4.  | <i>Triatoma matogrossensis</i> _192      | 0,153 | 0,140 | 0,006 |       |       |       |       |       |       |       |       |   |
| 5.  | <i>Triatoma matogrossensis</i> _191      | 0,153 | 0,140 | 0,006 | 0,000 |       |       |       |       |       |       |       |   |
| 6.  | <i>Triatoma matogrossensis</i>           | 0,153 | 0,140 | 0,006 | 0,006 | 0,006 |       |       |       |       |       |       |   |
| 7.  | <i>Triatoma matogrossensis</i> _kc608978 | 0,153 | 0,140 | 0,006 | 0,006 | 0,006 | 0,000 |       |       |       |       |       |   |
| 8.  | <i>Triatoma brasiliensis</i> _174        | 0,192 | 0,196 | 0,187 | 0,187 | 0,187 | 0,187 | 0,187 |       |       |       |       |   |
| 9.  | <i>Triatoma brasiliensis</i> _40         | 0,192 | 0,196 | 0,178 | 0,178 | 0,178 | 0,178 | 0,178 | 0,013 |       |       |       |   |
| 10. | <i>Triatoma brasiliensis</i> _41         | 0,192 | 0,196 | 0,178 | 0,178 | 0,178 | 0,178 | 0,178 | 0,013 | 0,000 |       |       |   |
| 11. | <i>Triatoma sherlocki</i>                | 0,192 | 0,204 | 0,213 | 0,213 | 0,213 | 0,213 | 0,213 | 0,150 | 0,141 | 0,141 |       |   |
| 12. | <i>Triatoma juazeirensis</i> _209        | 0,174 | 0,178 | 0,149 | 0,149 | 0,149 | 0,149 | 0,149 | 0,094 | 0,094 | 0,094 | 0,129 | - |

---
